# Supplementary material
Source: HighWire-hosted journal article supplement (http://www.qdcxjkg.com/highwire/filestream/121512/field_highwire_adjunct_files/4/ERJ-00159-2015_Fig_E5.pdf)

Fig E5

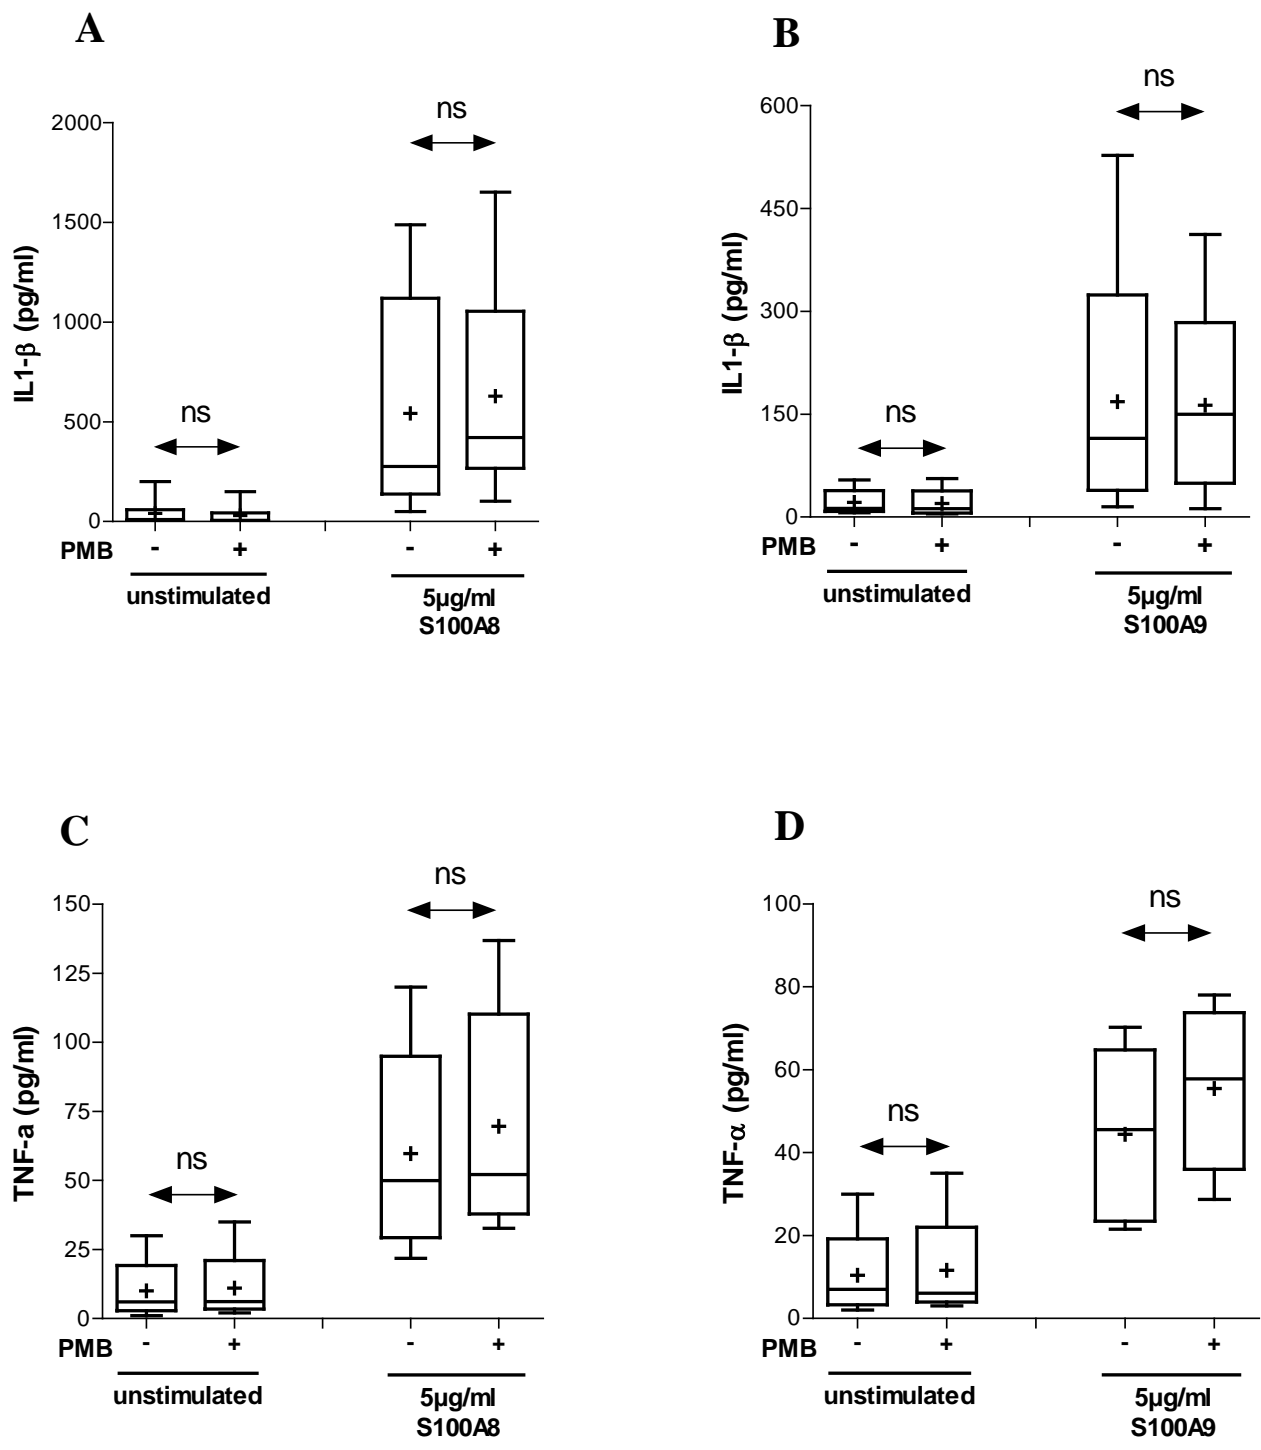

Supplement: ERJ-00159-2015_Fig_E5.pdf [file ERJ-00159-2015_Fig_E5.pdf]
